# Supplementary material
Source: Research Square preprint supplement (doi:10.21203/rs.3.rs-9419960/v1)
Supplement: Supplementary file 1 [file a6d708670d81ee3efbac79b4.docx]

**Table 1: Multilevel analysis: Evaluating firm and country-level institutional quality variations on sustainable innovation of manufacturing firms (dependent variable 1=firm introduced sustainable product innovation, 0 otherwise)**

| VARIABLES | Model 1 | Model 2 | Model 3 | Model 4 | Model 5 | Model 6 | Model 7 | Model 8 | Model 9 | Model 10 | Model 11 | Model 12 | Model 13 | Model 14 | Model 15 | Model 16 |
| --- | --- | --- | --- | --- | --- | --- | --- | --- | --- | --- | --- | --- | --- | --- | --- | --- |
|  |  |  |  |  |  |  |  |  |  |  |  |  |  |  |  |  |
| **Individual and level variables** |  |  |  |  |  |  |  |  |  |  |  |  |  |  |  |  |
| Firm age (log) | -0.000444 | -0.00156 | -0.00153 | -0.00151 | -0.00419 | -0.00414 | -0.00401 | -0.00164 | -0.00337 | -0.00234 | -0.00371 | -0.00358 | -0.00394 | -0.00404 | -0.00450 | -0.00434 |
|  | (0.0105) | (0.0106) | (0.0106) | (0.0106) | (0.0107) | (0.0107) | (0.0107) | (0.0105) | (0.0109) | (0.0107) | (0.0108) | (0.0108) | (0.0107) | (0.0107) | (0.0107) | (0.0108) |
| Firm size (reference base=micro firms) |  |  |  |  |  |  |  |  |  |  |  |  |  |  |  |  |
| large | 0.0978*** | 0.0995*** | 0.0995*** | 0.0995*** | 0.103*** | 0.103*** | 0.103*** | 0.1000*** | 0.102*** | 0.101*** | 0.102*** | 0.102*** | 0.102*** | 0.103*** | 0.103*** | 0.104*** |
|  | (0.0256) | (0.0259) | (0.0259) | (0.0259) | (0.0258) | (0.0258) | (0.0258) | (0.0259) | (0.0258) | (0.0259) | (0.0258) | (0.0258) | (0.0258) | (0.0259) | (0.0257) | (0.0258) |
| medium | 0.212*** | 0.212*** | 0.212*** | 0.212*** | 0.217*** | 0.217*** | 0.216*** | 0.213*** | 0.216*** | 0.214*** | 0.216*** | 0.216*** | 0.216*** | 0.216*** | 0.216*** | 0.217*** |
|  | (0.0283) | (0.0286) | (0.0286) | (0.0286) | (0.0283) | (0.0283) | (0.0283) | (0.0286) | (0.0283) | (0.0283) | (0.0283) | (0.0282) | (0.0280) | (0.0284) | (0.0281) | (0.0283) |
| small | 0.0295** | 0.0305** | 0.0305** | 0.0305** | 0.0323** | 0.0322** | 0.0320** | 0.0311** | 0.0325** | 0.0318** | 0.0327** | 0.0327** | 0.0328** | 0.0326** | 0.0325** | 0.0331** |
|  | (0.0147) | (0.0148) | (0.0148) | (0.0148) | (0.0149) | (0.0149) | (0.0149) | (0.0149) | (0.0149) | (0.0149) | (0.0149) | (0.0149) | (0.0149) | (0.0149) | (0.0149) | (0.0149) |
| multiple ownership | 0.0213 | 0.0200 | 0.0200 | 0.0200 | 0.0191 | 0.0191 | 0.0192 | 0.0192 | 0.0187 | 0.0189 | 0.0188 | 0.0190 | 0.0190 | 0.0185 | 0.0192 | 0.0183 |
|  | (0.0172) | (0.0173) | (0.0173) | (0.0173) | (0.0173) | (0.0173) | (0.0173) | (0.0173) | (0.0173) | (0.0173) | (0.0173) | (0.0173) | (0.0173) | (0.0172) | (0.0172) | (0.0172) |
| Intention to grow beyond current size | -0.0648*** | -0.0634*** | -0.0635*** | -0.0636*** | -0.0633*** | -0.0633*** | -0.0634*** | -0.0644*** | -0.0644*** | -0.0648*** | -0.0635*** | -0.0641*** | -0.0639*** | -0.0638*** | -0.0630*** | -0.0636*** |
|  | (0.0158) | (0.0157) | (0.0157) | (0.0157) | (0.0161) | (0.0161) | (0.0161) | (0.0159) | (0.0161) | (0.0159) | (0.0159) | (0.0160) | (0.0161) | (0.0163) | (0.0163) | (0.0163) |
| Strategy plan for sustainable development 1=yes) | 0.141*** | 0.143*** | 0.143*** | 0.143*** | 0.143*** | 0.143*** | 0.143*** | 0.143*** | 0.143*** | 0.143*** | 0.143*** | 0.143*** | 0.143*** | 0.143*** | 0.143*** | 0.143*** |
|  | (0.0187) | (0.0188) | (0.0189) | (0.0189) | (0.0186) | (0.0186) | (0.0186) | (0.0188) | (0.0187) | (0.0188) | (0.0187) | (0.0187) | (0.0186) | (0.0186) | (0.0185) | (0.0185) |
| **Country level variables** |  |  |  |  |  |  |  |  |  |  |  |  |  |  |  |  |
| GDP 2018 |  | 0.0138* |  |  |  |  |  |  |  |  |  |  |  |  |  |  |
|  |  | (0.00825) |  |  |  |  |  |  |  |  |  |  |  |  |  |  |
| GDP 2019 |  |  | 0.0130 |  |  |  |  |  |  |  |  |  |  |  |  |  |
|  |  |  | (0.00838) |  |  |  |  |  |  |  |  |  |  |  |  |  |
| GDP 2020 |  |  |  | 0.0126 |  |  |  |  |  |  |  |  |  |  |  |  |
|  |  |  |  | (0.00828) |  |  |  |  |  |  |  |  |  |  |  |  |
| GDP per capita 2018 |  |  |  |  | 1.94e-06*** |  |  |  |  |  |  |  |  |  |  |  |
|  |  |  |  |  | (6.52e-07) |  |  |  |  |  |  |  |  |  |  |  |
| GDP per capita 2019 |  |  |  |  |  | 1.97e-06*** |  |  |  |  |  |  |  |  |  |  |
|  |  |  |  |  |  | (6.85e-07) |  |  |  |  |  |  |  |  |  |  |
| GDP per capita2020 |  |  |  |  |  |  | 1.92e-06*** |  |  |  |  |  |  |  |  |  |
|  |  |  |  |  |  |  | (6.73e-07) |  |  |  |  |  |  |  |  |  |
| GDP growth |  |  |  |  |  |  |  | 5.35e-05 |  |  |  |  |  |  |  |  |
|  |  |  |  |  |  |  |  | (0.00457) |  |  |  |  |  |  |  |  |
| Control of corruption |  |  |  |  |  |  |  |  | 0.00198*** |  |  |  |  |  |  |  |
|  |  |  |  |  |  |  |  |  | (0.000761) |  |  |  |  |  |  |  |
| Political stability absence |  |  |  |  |  |  |  |  |  | 0.0489 |  |  |  |  |  |  |
|  |  |  |  |  |  |  |  |  |  | (0.0447) |  |  |  |  |  |  |
| Rule of law |  |  |  |  |  |  |  |  |  |  | 0.00267** |  |  |  |  |  |
|  |  |  |  |  |  |  |  |  |  |  | (0.00114) |  |  |  |  |  |
| Regulatory quality |  |  |  |  |  |  |  |  |  |  |  | 0.00335** |  |  |  |  |
|  |  |  |  |  |  |  |  |  |  |  |  | (0.00139) |  |  |  |  |
| Government effectiveness |  |  |  |  |  |  |  |  |  |  |  |  | 0.00245*** |  |  |  |
|  |  |  |  |  |  |  |  |  |  |  |  |  | (0.000936) |  |  |  |
| Environmental performance index |  |  |  |  |  |  |  |  |  |  |  |  |  | 0.00407* |  |  |
|  |  |  |  |  |  |  |  |  |  |  |  |  |  | (0.00217) |  |  |
| Global Innovation Index |  |  |  |  |  |  |  |  |  |  |  |  |  |  | 0.00548** |  |
|  |  |  |  |  |  |  |  |  |  |  |  |  |  |  | (0.00217) |  |
| Democracy Index |  |  |  |  |  |  |  |  |  |  |  |  |  |  |  | 0.0429** |
|  |  |  |  |  |  |  |  |  |  |  |  |  |  |  |  | (0.0180) |
| Constant | 0.149*** | 0.104** | 0.107** | 0.109** | 0.0970** | 0.0969** | 0.0994** | 0.156*** | 0.0178 | 0.130*** | -0.0460 | -0.106 | -0.0251 | -0.116 | -0.0890 | -0.164 |
|  | (0.0411) | (0.0512) | (0.0516) | (0.0511) | (0.0450) | (0.0454) | (0.0451) | (0.0474) | (0.0608) | (0.0494) | (0.0972) | (0.120) | (0.0842) | (0.153) | (0.105) | (0.140) |
|  |  |  |  |  |  |  |  |  |  |  |  |  |  |  |  |  |
| Observations | 2,855 | 2,818 | 2,818 | 2,818 | 2,818 | 2,818 | 2,818 | 2,818 | 2,818 | 2,818 | 2,818 | 2,818 | 2,818 | 2,818 | 2,818 | 2,818 |
| Number of groups | 37 | 36 | 36 | 36 | 36 | 36 | 36 | 36 | 36 | 36 | 36 | 36 | 36 | 36 | 36 | 36 |

Robust standard errors in parentheses

*** p<0.01, ** p<0.05, * p<0.1

**Table: Correlations Amongst the Country-Level Variables**

| **Variables** | **(1)** | **(2)** | **(3)** | **(4)** | **(5)** | **(6)** | **(7)** | **(8)** | **(9)** | **(10)** | **(11)** | **(12)** | **(13)** | **(14)** | **(15)** |
| --- | --- | --- | --- | --- | --- | --- | --- | --- | --- | --- | --- | --- | --- | --- | --- |
| (1) GDP 2018 | 1 |  |  |  |  |  |  |  |  |  |  |  |  |  |  |
| (2) GDP 2019 | 0.9987*** | 1 |  |  |  |  |  |  |  |  |  |  |  |  |  |
| (3) GDP 2020 | 0.9935*** | 0.9965*** | 1 |  |  |  |  |  |  |  |  |  |  |  |  |
| (4) GDP per capita 2018 | 0.2269 | 0.2069 | 0.2284 | 1 |  |  |  |  |  |  |  |  |  |  |  |
| (5) GDP per capita 2019 | 0.2214 | 0.2033 | 0.2262 | 0.9987*** | 1 |  |  |  |  |  |  |  |  |  |  |
| (6) GDP per capita 2020 | 0.2410 | 0.2248 | 0.2524 | 0.9934*** | 0.9966*** | 1 |  |  |  |  |  |  |  |  |  |
| (7) GDP growth | 0.3339** | 0.3362** | 0.3616** | 0.2445 | 0.2520 | 0.2853* | 1 |  |  |  |  |  |  |  |  |
| (8) Control of Corruption | 0.0976 | 0.0818 | 0.0974 | 0.6951*** | 0.6959*** | 0.6857*** | 0.0991 | 1 |  |  |  |  |  |  |  |
| (9) Government Effectiveness | 0.1588 | 0.1443 | 0.1584 | 0.7277*** | 0.7301*** | 0.7169*** | 0.0386 | 0.7694*** | 1 |  |  |  |  |  |  |
| (10) Political Stability and Absence of Violence | 0.0381 | 0.0365 | 0.0661 | 0.5626*** | 0.5602*** | 0.5561*** | -0.0747 | 0.6070*** | 0.7597*** | 1 |  |  |  |  |  |
| (11) Regulatory Quality | 0.1411 | 0.1304 | 0.1567 | 0.7568*** | 0.7601*** | 0.7526*** | 0.0990 | 0.8285*** | 0.9395*** | 0.7831*** | 1 |  |  |  |  |
| (12) Rule of Law | 0.0836 | 0.0702 | 0.0921 | 0.7508*** | 0.7534*** | 0.7414*** | 0.0872 | 0.7955*** | 0.9379*** | 0.7972*** | 0.9574*** | 1 |  |  |  |
| (13) Environmental Performance Index | 0.0072 | -0.0089 | 0.0098 | 0.7519*** | 0.7490*** | 0.7344*** | -0.1409 | 0.7220*** | 0.8656*** | 0.7560*** | 0.8632*** | 0.8824*** | 1 |  |  |
| (14) Global Innovation Index | 0.1259 | 0.1134 | 0.1302 | 0.7387*** | 0.7478*** | 0.7373*** | 0.0545 | 0.7941*** | 0.8454*** | 0.5673*** | 0.8738*** | 0.8593*** | 0.8354*** | 1 |  |
| (15) Democracy Index | 0.0184 | 0.0030 | 0.0189 | 0.7792*** | 0.7764*** | 0.7553*** | 0.0014 | 0.7750*** | 0.8656*** | 0.7583*** | 0.8808*** | 0.8887*** | 0.8818*** | 0.8456*** | 1 |

**Notes: *** p < 0.01, ** p < 0.05, * p < 0.10.**

**Source: Authors’ calculations.**
